# Supplementary material for: Peroxisome-Deficiency and HIF-2α Signaling Are Negative Regulators of Ketohexokinase Expression
Source: PubMed Central journal article supplement (PMC7360681; doi:10.3389/fcell.2020.00566), 2020-07-08
Supplement: Data_Sheet_1.pdf [file Data_Sheet_1.pdf]

## **SUPPLEMENTAL INFORMATION**

### **Peroxisome-deficiency and HIF-2 $\alpha$ signaling are negative regulators of ketohexokinase expression**

Tanja Eberhart, Miriam J. Schönenberger, Katharina M. Walter, Khanichi N. Charles,  
Phyllis L. Faust, Werner J. Kovacs

Figure S1, related to Figures 1 and 2

**A**

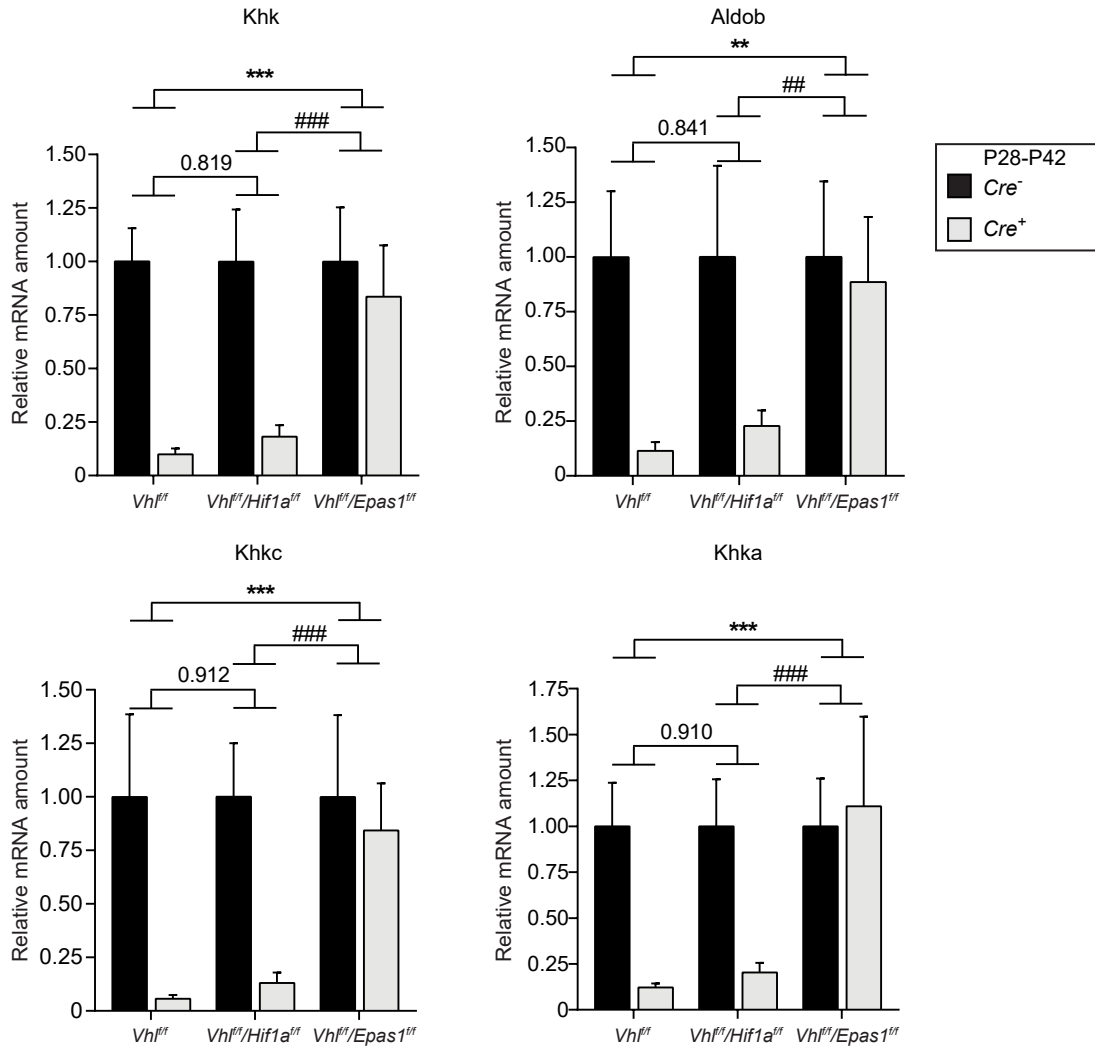

**B**

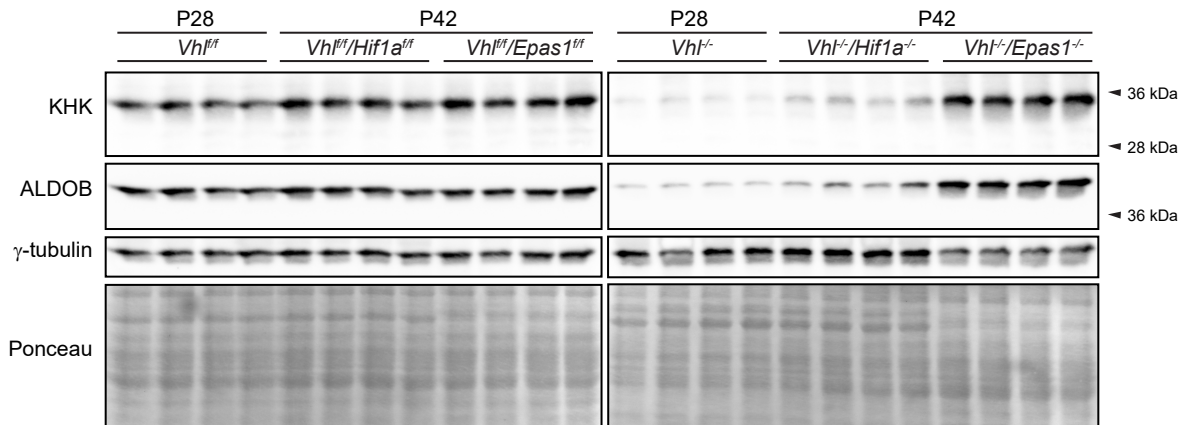

**Supplementary Figure S1. Analysis of the fructolytic pathway in *Vhl*<sup>-/-</sup>, *Vhl*<sup>-/-</sup>/*Hif1a*<sup>-/-</sup> and *Vhl*<sup>-/-</sup>/*Epas1*<sup>-/-</sup> livers; related to Figures 1 and 2.** The fructolytic pathway was analyzed in P28 *Vhl*<sup>fl/fl</sup> (control) and liver-specific *Vhl*<sup>-/-</sup> mice and P28-P42 control (*Cre*<sup>-</sup>: *Vhl*<sup>fl/fl</sup>/*Hif1a*<sup>fl/fl</sup> and *Vhl*<sup>fl/fl</sup>/*Epas1*<sup>fl/fl</sup>) and liver-specific *Vhl*<sup>-/-</sup>/*Hif1a*<sup>-/-</sup> and *Vhl*<sup>-/-</sup>/*Epas1*<sup>-/-</sup> mice. **(A)** Statistical evaluation of the hepatic expression changes of fructolytic genes in *Cre*<sup>+</sup> mice and their respective *Cre*<sup>-</sup> control mice between the different mouse strains (i.e., variances between *Vhl*<sup>fl/fl</sup> + *Vhl*<sup>-/-</sup> mice, *Vhl*<sup>fl/fl</sup>/*Hif1a*<sup>fl/fl</sup> + *Vhl*<sup>-/-</sup>/*Hif1a*<sup>-/-</sup> mice, and *Vhl*<sup>fl/fl</sup>/*Epas1*<sup>fl/fl</sup> + *Vhl*<sup>-/-</sup>/*Epas1*<sup>-/-</sup> mice). A 2-way ANOVA followed by a Tukey's multiple comparisons test was performed using GraphPad Prism 8.2.0. Each value represents the amount of mRNA in *Vhl*<sup>-/-</sup>, *Vhl*<sup>-/-</sup>/*Hif1a*<sup>-/-</sup> and *Vhl*<sup>-/-</sup>/*Epas1*<sup>-/-</sup> mice relative to that in respective control mice, which was arbitrarily defined as 1. *Cyclophilin* was used as the invariant control. Data are mean ± SD (n = 7 for *Vhl*<sup>fl/fl</sup> and *Vhl*<sup>-/-</sup> mice; n = 10 for *Vhl*<sup>fl/fl</sup>/*Hif1a*<sup>fl/fl</sup>, *Vhl*<sup>-/-</sup>/*Hif1a*<sup>-/-</sup>, *Vhl*<sup>fl/fl</sup>/*Epas1*<sup>fl/fl</sup>, and *Vhl*<sup>-/-</sup>/*Epas1*<sup>-/-</sup> mice). \*\*, *p* < 0.01; \*\*\*, *p* < 0.001; ##, *p* < 0.01; ###, *p* < 0.001. **(B)** Immunoblots of liver lysates from P28-P42 mice with antibodies against total KHK, ALDOB, and  $\gamma$ -tubulin as loading control. Note that total KHK and ALDOB protein levels were not decreased in *Vhl*<sup>-/-</sup>/*Epas1*<sup>-/-</sup> livers, where only HIF-1 $\alpha$  was stabilized and active.

**Table S1.** Antibodies for western blot analysis

| Target     | Host       | Dilution   | Source<br>(Product number, company)             |
|------------|------------|------------|-------------------------------------------------|
| KHK        | Mouse      | 1:500      | Sc-377411, Santa Cruz Biotechnology             |
| Aldolase B | Rabbit     | 1:2000     | ab153828, Abcam                                 |
| ACOX1      | Rabbit     | 0.01 µg/µl | Gift from A. Völkl and D. Fahimi <sup>(1)</sup> |
| EHHADH     | Rabbit     | 0.01 µg/µl | Gift from A. Völkl and D. Fahimi <sup>(1)</sup> |
| ABCD3      | Mouse      | 1:1000     | SAB4200181, Sigma-Aldrich                       |
| ACBD5      | Rabbit     | 1:1000     | 21080-1-AP, Proteintech                         |
| Catalase   | Rabbit     | 1:8000     | 208910, Calbiochem                              |
| PEX14      | Rabbit     | 1:1000     | 10594-1-AP, Proteintech                         |
| β-Actin    | Mouse      | 1:5000     | A5316, Sigma-Aldrich                            |
| γ-Tubulin  | Mouse      | 1:5000     | T6557, Sigma-Aldrich                            |
| α-Tubulin  | Rabbit     | 1:5000     | ab18251, Abcam                                  |
| SF3B1      | Rabbit     | 1:1000     | ab172634, Abcam                                 |
| A1CF       | Rabbit     | 1:1000     | PA5-60608, Invitrogen                           |
| HNRNPH1/2  | Rabbit     | 1:1000     | ab154894, Abcam                                 |
| Lamin B1   | Rabbit     | 1:5000     | ab16048, Abcam                                  |
| NBR1       | Mouse      | 1:500      | Ab55474, Abcam                                  |
| SQSTM1     | Guinea pig | 1:1000     | GP62, Progen                                    |
| UOX        | Rabbit     | 0.01 µg/µl | Gift from A. Völkl and D. Fahimi <sup>(1)</sup> |
| VDAC       | Rabbit     | 1:5000     | AB10527, Merck Millipore                        |

<sup>(1)</sup>Beier, K., Völkl, A., Hashimoto, T. & Fahimi, H.D. (1988). Selective induction of peroxisomal enzymes by the hypolipidemic drug bezafibrate. Detection of modulations by automatic image analysis in conjunction with immunoelectron microscopy and immunoblotting. *Eur. J. Cell Biol.* 46, 383-393.

**Table S2.** Quantitative real-time PCR primer.

| Gene                              | Species             | Forward primer                | Reverse primer                |
|-----------------------------------|---------------------|-------------------------------|-------------------------------|
| <i>Slc2a1</i><br>( <i>Glut1</i> ) | <i>Mus musculus</i> | 5'-CAGTTCGGCTATAAACTGGTG-3'   | 5'-GCCCCGACAGAGAAGATG-3'      |
| <i>Pfkl</i>                       | <i>Mus musculus</i> | 5'-GGAGGCGAGAACATCAAGCC-3'    | 5'-GCACTGCCAATAATGGTGCC-3'    |
| <i>Eno1</i>                       | <i>Mus musculus</i> | 5'-TGCGTCCACTGGCATCTAC-3'     | 5'-CAGAGCAGGCGCAATAGTTTAA-3'  |
| <i>Gpi1</i>                       | <i>Mus musculus</i> | 5'-TCAAGCTGCGGAACTTTTTG-3'    | 5'-GGTCTTGGAGTAGTCCACCAG-3'   |
| <i>Tpi1</i>                       | <i>Mus musculus</i> | 5'-CCAGGAAGTTCTTCGTTGGGG-3'   | 5'-CAAAGTCGATGTAAGCGGTGG-3'   |
| <i>Ldha</i>                       | <i>Mus musculus</i> | 5'-TGTCTCCAGCAAAGACTACTGT-3'  | 5'-GACTGTACTTGACAATGTTGGGA-3' |
| <i>Bnip3</i>                      | <i>Mus musculus</i> | 5'-TCCTGGGTAGAACTGCACTTC-3'   | 5'-GCTGGGCATCCAACAGTATTT-3'   |
| <i>Bnip3l</i>                     | <i>Mus musculus</i> | 5'-ATGTCTCACTTAGTCGAGCCG-3'   | 5'-CTCATGCTGTGCATCCAGGA-3'    |
| <i>Pdk1</i>                       | <i>Mus musculus</i> | 5'-GGACTTCGGGTCAGTGAATGC-3'   | 5'-TCCTGAGAAGATTGTCGGGA-3'    |
| <i>Pgk1</i>                       | <i>Mus musculus</i> | 5'-ATGTCGCTTCCAACAAGCTG-3'    | 5'-GCTCCATTGTCCAAGCAGAAT-3'   |
| <i>Egln3</i>                      | <i>Mus musculus</i> | 5'-AGGCAATGGTGGCTTGCTATC-3'   | 5'-GCGTCCCAATTCTTATTCAGGT-3'  |
| <i>Epo</i>                        | <i>Mus musculus</i> | 5'-CCTCATCTGCGACAGTCGAG-3'    | 5'-ACAACCCATCGTGACATTTTCT-3'  |
| <i>Khk</i>                        | <i>Mus musculus</i> | 5'-AGGTCGATCTGACCCGGTT-3'     | 5'-TCACGGGGCTTCTCTATCTCC-3'   |
| <i>Khkc</i>                       | <i>Mus musculus</i> | 5'-GCGTGGATGTGTCTCAAGTG-3'    | 5'-GGGTCAGATCGACCTTCTCA-3'    |
| <i>Khka</i>                       | <i>Mus musculus</i> | 5'-TTGCCGATTTGTCTGGAT-3'      | 5'-CCTCGGTCTGAAGGACCACAT-3'   |
| <i>Aldob</i>                      | <i>Mus musculus</i> | 5'-GAAACCGCCTGCAAAGGATAA-3'   | 5'-GAGGGTCTCGTGGAAAAGGAT-3'   |
| <i>Slc2a2</i><br>( <i>Glut2</i> ) | <i>Mus musculus</i> | 5'-TCAGAAGACAAGATCACCGGA-3'   | 5'-GCTGGTGTGACTGTAAGTGGG-3'   |
| <i>Pdgfb</i>                      | <i>Mus musculus</i> | 5'-CATCCGCTCCTTTGATGATCTT-3'  | 5'-GTGCTCGGTCATGTTCAAGT-3'    |
| <i>Pkm2</i>                       | <i>Mus musculus</i> | 5'-CGCCTGGACATTGACTCTG-3'     | 5'-GAAATCAGCCGAGCCACATT-3'    |
| <i>Slc2a5</i><br>( <i>Glut5</i> ) | <i>Mus musculus</i> | 5'-CCAATATGGGTACAACGTAGCTG-3' | 5'-GCGTCAAGGTGAAGGACTCAATA-3' |
| <i>Pex11a</i>                     | <i>Mus musculus</i> | 5'-GACGCCTTCATCCGAGTCG-3'     | 5'-CGGCCTCTTTGTCAGCTTTAGA-3'  |
| <i>Acox1</i>                      | <i>Mus musculus</i> | 5'-TCCAGACTTCCAACATGAGGA-3'   | 5'-CTGGGCGTAGGTGCCAATTA-3'    |
| <i>Ehhadh</i>                     | <i>Mus musculus</i> | 5'-ATGGCTGAGTATCTGAGGCTG-3'   | 5'-GGTCCAAACTAGCTTCTGGAG-3'   |

|                 |                     |                               |                              |
|-----------------|---------------------|-------------------------------|------------------------------|
| <i>Cpt1a</i>    | <i>Mus musculus</i> | 5'-CTCCGCCTGAGCCATGAAG-3'     | 5'-CACCAGTGATGATGCCATTCT-3'  |
| <i>Cyp4a10</i>  | <i>Mus musculus</i> | 5'-TTCCCTGATGGACGCTCTTTA-3'   | 5'-GCAAACCTGGAAGGGTCAAAC-3'  |
| <i>Crat</i>     | <i>Mus musculus</i> | 5'-CAGCCCATCGTGAGTGAGG-3'     | 5'-CGGACAGCCAGTTCTCCATTT-3'  |
| <i>Sf3b1</i>    | <i>Mus musculus</i> | 5'-GTGGGCCTTGATTCCACAGG-3'    | 5'-GGCTTCTTCTGACCGAGCAA-3'   |
| <i>Alcf</i>     | <i>Mus musculus</i> | 5'-TGTAGCTGTGATCCCACTCT-3'    | 5'-CTGGTGTTTTGGCTCGTGT-3'    |
| <i>Hnrnp1</i>   | <i>Mus musculus</i> | 5'-AAATGGGGCTCAAGGTATTCG-3'   | 5'-GGACCAGTATGCTTCAACACC-3'  |
| <i>Hnrnp2</i>   | <i>Mus musculus</i> | 5'-GGAGGGGTTCGTGGTGAAG-3'     | 5'-GAACACCTGATGTGCCATTTTG-3' |
| <i>18S rRNA</i> | <i>Mus musculus</i> | 5'-GTTCCGACCATAAACGATGCC-3'   | 5'-TGGTGGTGCCCTCCGTCAAT-3'   |
| <i>Ppia</i>     | <i>Mus musculus</i> | 5'-GAGCTGTTTGACAGACAAAGTTC-3' | 5'-CCCTGGCACATGAATCCTGG-3'   |
| <i>Atg5</i>     | <i>Mus musculus</i> | 5'-TGTGCTTCGAGATGTGTGGTT-3'   | 5'-ACCAACGTCAAATAGCTGACTC-3' |
| <i>Vhl</i>      | <i>Mus musculus</i> | 5'-CATCAGCTACCGAGGTCAT-3'     | 5'-ACATTGAGGGATGGCACAAAC-3'  |
